# Supplementary material for: Tunable two-photon absorption near-infrared materials containing different electron-donors and a π-bridge center with applications in bioimaging in live cells
Source: Royal Society of Chemistry journal article supplement (doi:10.1039/c5tc00716j), 2015-01-01
Supplement: c5tc00716j1.pdf [file c5tc00716j1.pdf]

## Supporting Information

### Tunable two-photon absorption near-infrared materials by different electron-donors and $\pi$ -bridge center with applications in bioimaging in live cells

Ming Kong,<sup>a</sup> Ting Wang,<sup>b</sup> Xiaohu Tian,<sup>a</sup> Fang Wang,<sup>a</sup> Yanqiu Liu,<sup>a</sup> Qiong Zhang,<sup>a</sup> Hui  
Wang,<sup>a</sup> Hongping Zhou,<sup>a</sup> Jieying Wu <sup>\*a</sup> and Yupeng Tian <sup>\*a</sup>

<sup>a</sup> Department of Chemistry, Key Laboratory of Functional Inorganic Material  
Chemistry of Anhui Province, Anhui University, Hefei 230039, P. R. China

<sup>b</sup> School of Life Science, Anhui University, Anhui Province Key Laboratory of R&D  
of Chinese Medicine, Hefei, China

E-mail: jywu1957@163.com; yptian@ahu.edu.cn

|                                                                                                                                                  |    |
|--------------------------------------------------------------------------------------------------------------------------------------------------|----|
| <b>S1. General methods</b> .....                                                                                                                 | 2  |
| <b>Figure S1.</b> MALDI-TOF-MS of <b>X1</b> .....                                                                                                | 5  |
| <b>Figure S2.</b> <sup>1</sup> H NMR of <b>X2</b> .....                                                                                          | 5  |
| <b>Figure S3</b> <sup>13</sup> C NMR of <b>X2</b> .....                                                                                          | 6  |
| <b>Figure S4</b> MALDI-TOF-MS of <b>X2</b> .....                                                                                                 | 6  |
| <b>Figure S5</b> <sup>1</sup> H NMR of <b>X3</b> .....                                                                                           | 7  |
| <b>Figure S6</b> <sup>13</sup> C NMR of <b>X3</b> .....                                                                                          | 7  |
| <b>Figure S7</b> MALDI-TOF-MS of <b>X3</b> .....                                                                                                 | 8  |
| <b>Figure S8</b> <sup>1</sup> H NMR of <b>XT1</b> .....                                                                                          | 8  |
| <b>Figure S9</b> <sup>13</sup> C NMR of <b>XT1</b> .....                                                                                         | 9  |
| <b>Figure S10</b> MALDI-TOF-MS of <b>XT1</b> .....                                                                                               | 9  |
| <b>Figure S11</b> <sup>1</sup> H NMR of <b>XT2</b> .....                                                                                         | 10 |
| <b>Figure S12</b> <sup>13</sup> C NMR of <b>XT2</b> .....                                                                                        | 10 |
| <b>Figure S13</b> MALDI-TOF-MS of <b>XT2</b> .....                                                                                               | 11 |
| <b>Figure S14</b> <sup>1</sup> H NMR of <b>XT3</b> .....                                                                                         | 11 |
| <b>Figure S15</b> <sup>13</sup> C NMR of <b>XT3</b> .....                                                                                        | 12 |
| <b>Figure S16</b> MALDI-TOF-MS of <b>XT3</b> .....                                                                                               | 12 |
| <b>Figure S17</b> Alternative views of <b>X1</b> , <b>XT1</b> , <b>XT2</b> and <b>XT3</b> showing the quasi-planarity of terminal moieties ..... | 13 |
| <b>Figure S18</b> The crystal photograph of <b>XT1</b> .....                                                                                     | 13 |
| <b>Table S1</b> Selected bond lengths (Å) and angles (°) for <b>X1</b> .....                                                                     | 13 |
| <b>Table S2</b> Selected $\pi$ - $\pi$ , C-H $\cdots$ $\pi$ Interactions and potential hydrogen bonds in <b>X1</b> .....                         | 14 |
| <b>Table S3</b> Selected bond lengths (Å) and angles (°) for <b>XT1</b> .....                                                                    | 14 |

|                                                                                                                                                                                                                   |    |
|-------------------------------------------------------------------------------------------------------------------------------------------------------------------------------------------------------------------|----|
| <b>Table S4</b> Selected $\pi\cdots\pi$ , C-H $\cdots\pi$ Interactions and potential hydrogen bonds in <b>XT1</b> .....                                                                                           | 15 |
| <b>Table S5</b> Selected bond lengths (Å) and angles (°) for <b>XT2</b> .....                                                                                                                                     | 15 |
| <b>Table S6</b> Selected $\pi\cdots\pi$ , C-H $\cdots\pi$ Interactions and potential hydrogen bonds in <b>XT2</b> .....                                                                                           | 16 |
| <b>Table S7</b> Selected bond lengths (Å) and angles (°) for <b>XT3</b> .....                                                                                                                                     | 16 |
| <b>Table S8</b> Selected $\pi\cdots\pi$ , C-H $\cdots\pi$ Interactions and potential hydrogen bonds in <b>XT3</b> .....                                                                                           | 17 |
| <b>Table S9</b> Single-photon-related photophysical properties of six dyes in different solvents .....                                                                                                            | 17 |
| <b>Figure S19</b> Fluorescence spectra of dyes <b>X1</b> (left) and <b>XT1</b> (right) in different solvents of different polarities with a concentration of $1.0\times 10^{-5}$ mol/L.....                       | 18 |
| <b>Figure S20</b> The formation process of hydrogen bond.....                                                                                                                                                     | 19 |
| <b>Table S10</b> Selected experimental and calculated optical data for the dyes.....                                                                                                                              | 19 |
| <b>Figure S21</b> Absorption spectra of dyes <b>X2</b> , <b>X3</b> , <b>XT2</b> and <b>XT3</b> in different solvents of different polarities with a concentration of $1.0\times 10^{-5}$ mol/L.....               | 20 |
| <b>Figure S22</b> Fluorescence spectra of dye <b>X2</b> in different solvents of different polarities with a concentration of $1.0\times 10^{-5}$ mol/L.....                                                      | 20 |
| <b>Figure S23</b> Fluorescence spectra of dye <b>X3</b> in different solvents of different polarities with a concentration of $1.0\times 10^{-5}$ mol/L.....                                                      | 21 |
| <b>Figure S24</b> Fluorescence spectra of dye <b>XT2</b> in different solvents of different polarities with a concentration of $1.0\times 10^{-5}$ mol/L.....                                                     | 21 |
| <b>Figure S25</b> Fluorescence spectra of dye <b>XT3</b> in different solvents of different polarities with a concentration of $1.0\times 10^{-5}$ mol/L.....                                                     | 21 |
| <b>Figure S26</b> Two-photon absorption verification of <b>X2</b> , <b>X3</b> , <b>XT1</b> and <b>XT2</b> which $I_{in}$ and $I_{out}$ represent the input laser power and output fluorescence, respectively..... | 22 |
| <b>Figure S27</b> Time-dependent two-photon excited fluorescence of <b>X2</b> excited at 790 nm in DMF.....                                                                                                       | 22 |
| <b>Figure S28</b> Time-dependent two-photon excited fluorescence of <b>X3</b> excited at 790 nm in DMF.....                                                                                                       | 22 |
| <b>Figure S29</b> Time-dependent two-photon excited fluorescence of <b>XT1</b> excited at 830 nm in DMF.....                                                                                                      | 23 |
| <b>Figure S30.</b> MTT assay of HepG2 cells incubate with dyes <b>X2</b> at different concentrations for 24h.....                                                                                                 | 23 |
| <b>Figure S31.</b> MTT assay of HepG2 cells incubate with dyes <b>XT1</b> at different concentrations for 24h. ....                                                                                               | 24 |

## S1. General methods

All chemicals were commercially available and used as obtained. The solvents were

purified by conventional methods before use. The  $^1\text{H}$  NMR and  $^{13}\text{C}$  NMR spectra recorded on at  $25^\circ\text{C}$  using Bruker Avance 400 spectrometer were reported as parts per million (ppm) from TMS. IR spectra were recorded on NEXUS 870 (Nicolet) spectrophotometer in the  $400\text{-}4000\text{ cm}^{-1}$  region using a powder sample on a KBr plate. Mass spectra were obtained on a Micromass MALDI-TOF-MS.

**X-ray crystallography and structure solution.** The X-ray diffraction measurements were performed on a Bruker SMART CCD area detector using graphite monochromated  $\text{MoK}\alpha$  radiation ( $\lambda = 0.71069\text{ \AA}$ ) at  $298(2)\text{ K}$ . Intensity data were collected in the variable  $\omega$ -scan mode. The structures were solved by direct methods and difference Fourier syntheses. The non-hydrogen atoms were refined anisotropically and hydrogen atoms were introduced geometrically. Calculations were performed with the SHELXTL-97 program package. Crystallographic data (excluding structure factors) for the structures reported in this paper have been deposited with the Cambridge Crystallographic Data Centre as supplementary publication no. CCDC number: **X1** (965153), **XT1** (991562), **XT2** (991563), **XT3** (991564). Details of the crystal parameters, data collections and refinements for the complexes are summarized in **Table 1** and selected bond distances and angles are listed in **supporting**.

**Absorption and fluorescence spectra.** Absorption spectra were obtained on a UV-265 spectrophotometer, Fluorescence measurements were performed using a Hitachi F-7000 fluorescence spectrophotometer excited at the longest absorption band with a 1 cm standard quartz cell. The concentration of sample solution was  $1.0 \times 10^{-5}\text{ mol/L}$ . The excitation and emission slit widths were all 5 nm. For time-resolved fluorescence measurements, the fluorescence signals were collimated and focused onto the entrance slit of a monochromator with the output plane equipped with a photomultiplier tube (HORIBA HuoroMax-4P). The decays were analyzed by 'least-squares'. The quality of the exponential fits was evaluated by the goodness of fit ( $\chi^2$ ).

**Theoretical calculation.** To better identify the charge transition, time-dependent density functional theory (TD-DFT) calculations were carried out in ethanol. Geometry optimizations (**X2** and **X3**) were carried out with B3LYP functional

without any symmetry restraint, and the TD-DFT calculations were performed on the optimized structure with B3LYP functional. For **X1**, **XT1**, **XT2** and **XT3**, the crystal structures were directly adopted for TD-DFT calculations. All calculations, including optimizations and TD-DFT, were performed with the G03 software. Geometry optimization of the singlet ground state and the TD-DFT calculation of the lowest 50 singlet-singlet excitation energies were calculated with a basis set composed of 6-31 G for C H N O S atoms. An analytical frequency confirmed evidence that the calculated species represents a true minimum without imaginary frequencies on the respective potential energy surface. The lowest 40 spin-allowed singlet-singlet transitions, up to energy of about 5 eV, were taken into account in the calculation of the absorption spectra.

### **Fluorescence quantum yield**

The fluorescence quantum yield was measured by using

$$\Phi_s = \Phi_r \left( \frac{A_r \eta_s^2 D_s}{A_s \eta_r^2 D_r} \right)$$

in which the subscripts *s* and *r* stand for designate the sample and reference sample, respectively, *A* is the absorbance at  $\lambda_{\text{exc}}$ ,  $\eta$  is the average refractive index of the appropriate solution, and *D* is the integrated fluorescence area under the corrected emission spectrum. Here, quinine sulfate in 1 N H<sub>2</sub>SO<sub>4</sub> was used as the reference ( $\Phi=0.54$ ). All the measurements were at room temperature.

**Microscopy.** HepG2 cells were imaged on a Zeiss LSM 710 META upright confocal laser scanning microscope using magnification 40× and 100× water-dipping lenses for monolayer cultures. Image data acquisition and processing was performed using Zeiss LSM Image Browser, Zeiss LSM Image Expert and Image J.

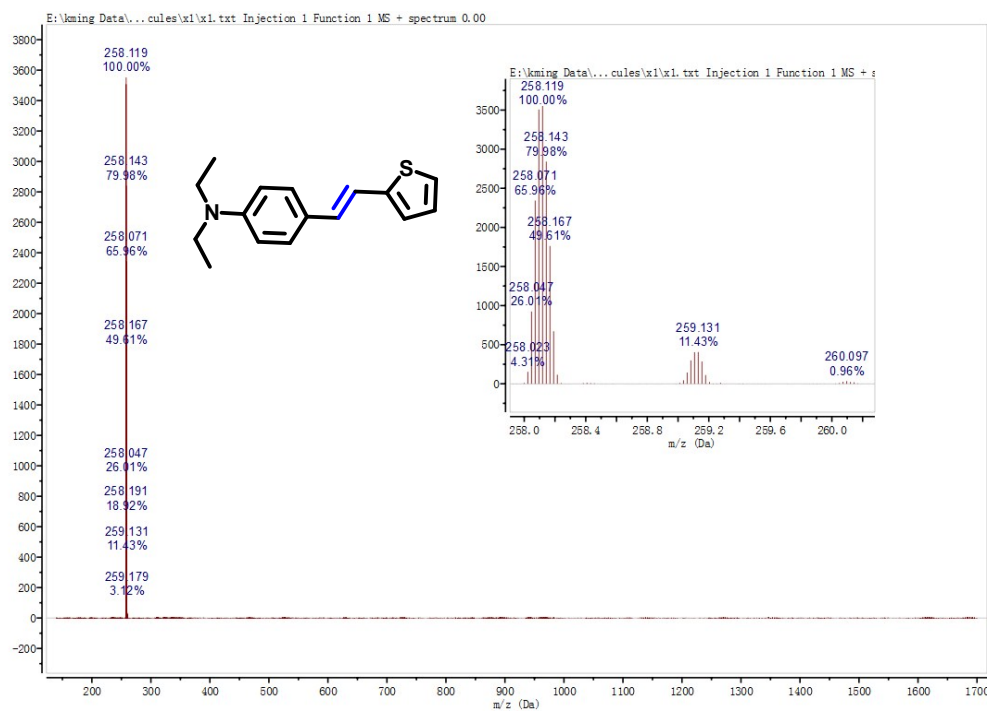

Figure S1. MALDI-TOF-MS of X1

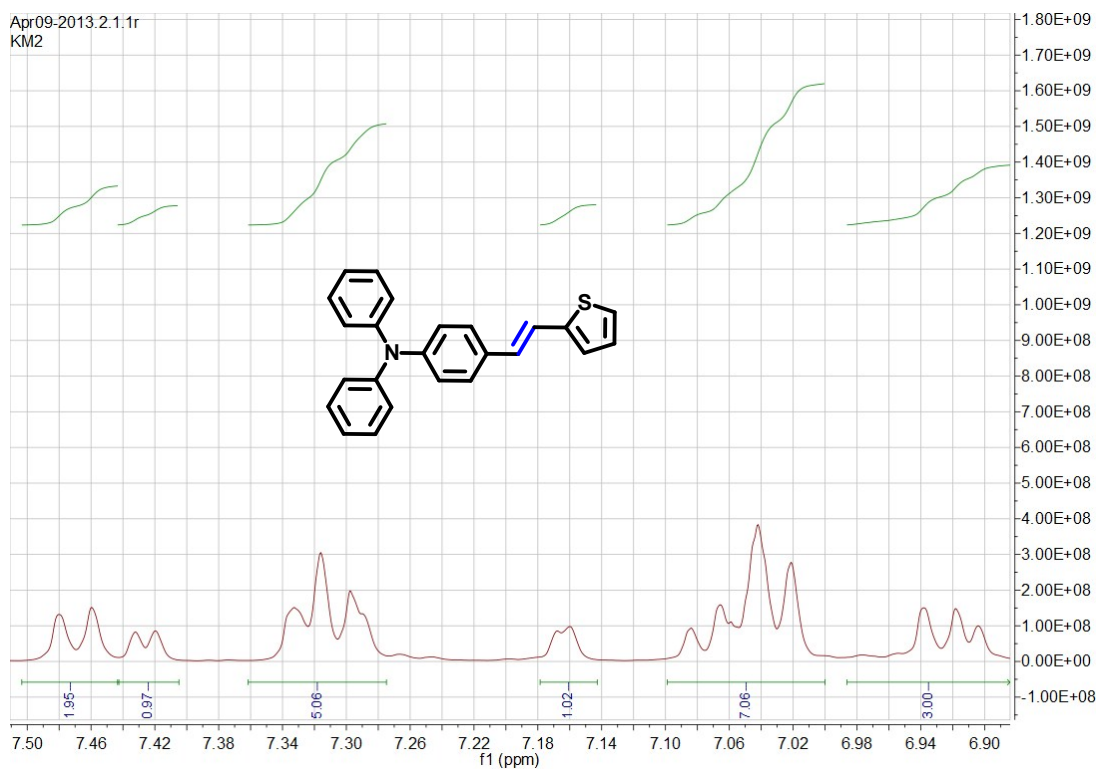

Figure S2. <sup>1</sup>H NMR of X2

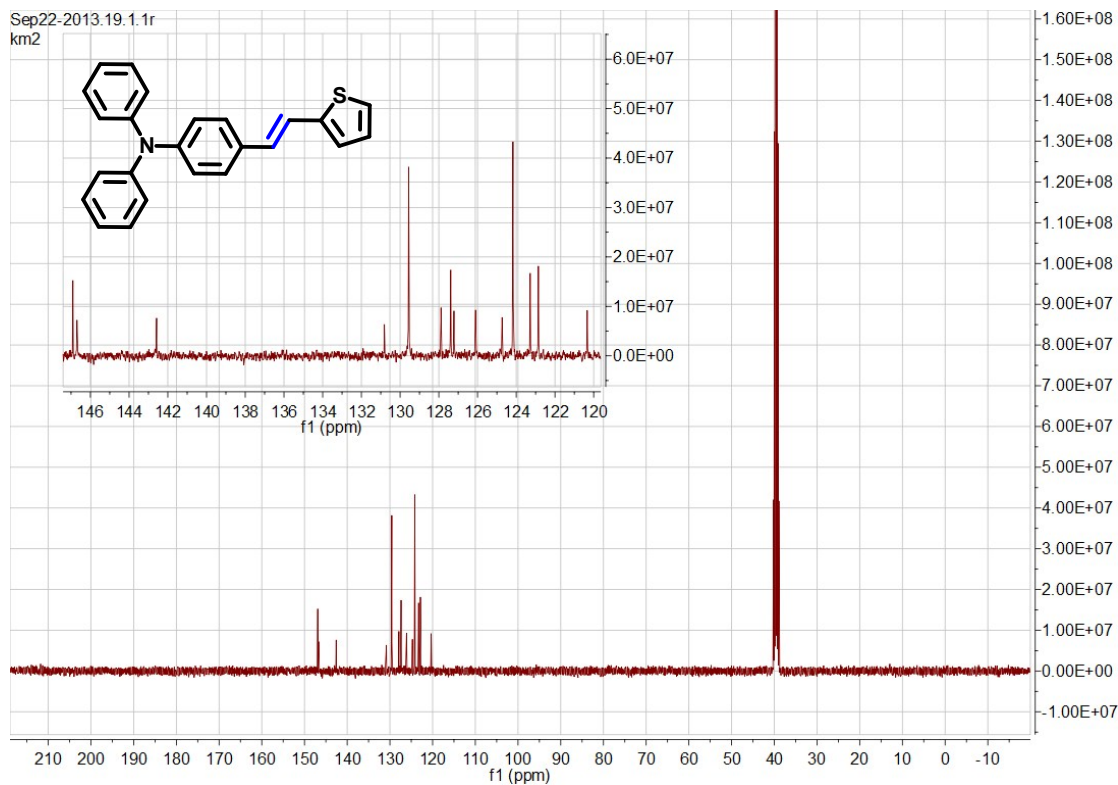

Figure S3.  $^{13}\text{C}$  NMR of X2

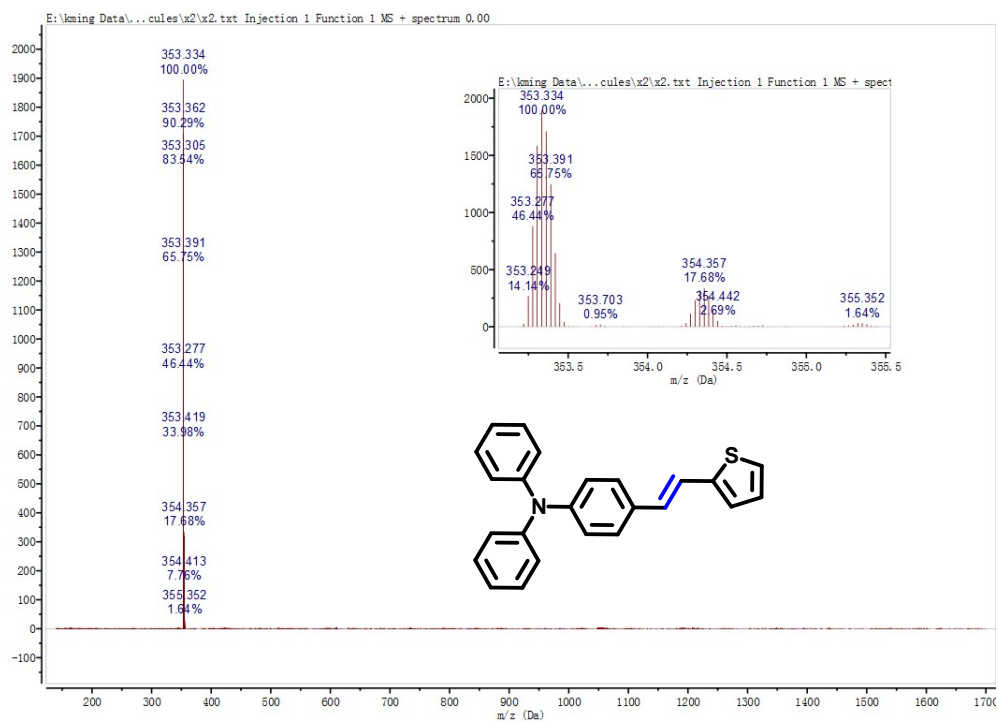

Figure S4. MALDI-TOF-MS of X2

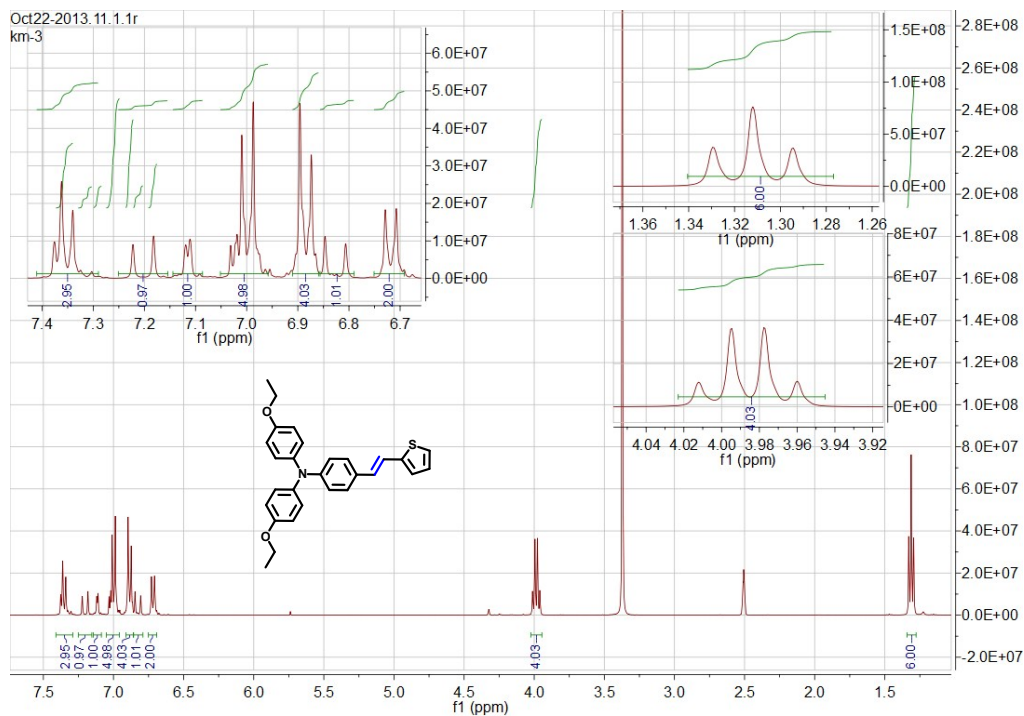

**Figure S5. <sup>1</sup>H NMR of X3**

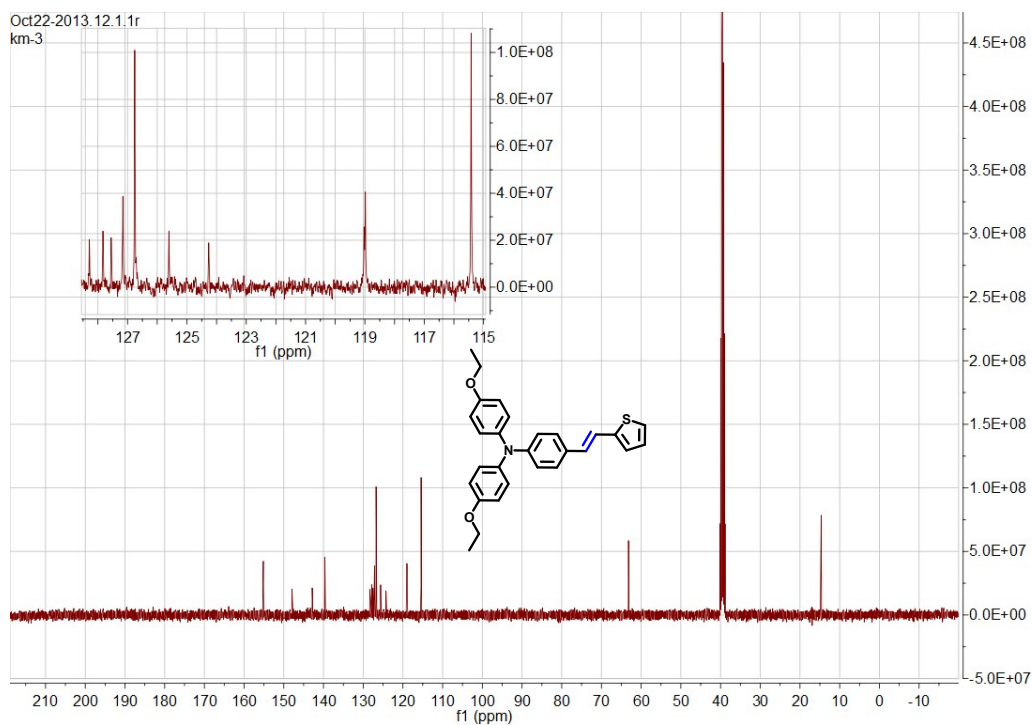

**Figure S6. <sup>13</sup>C NMR of X3**

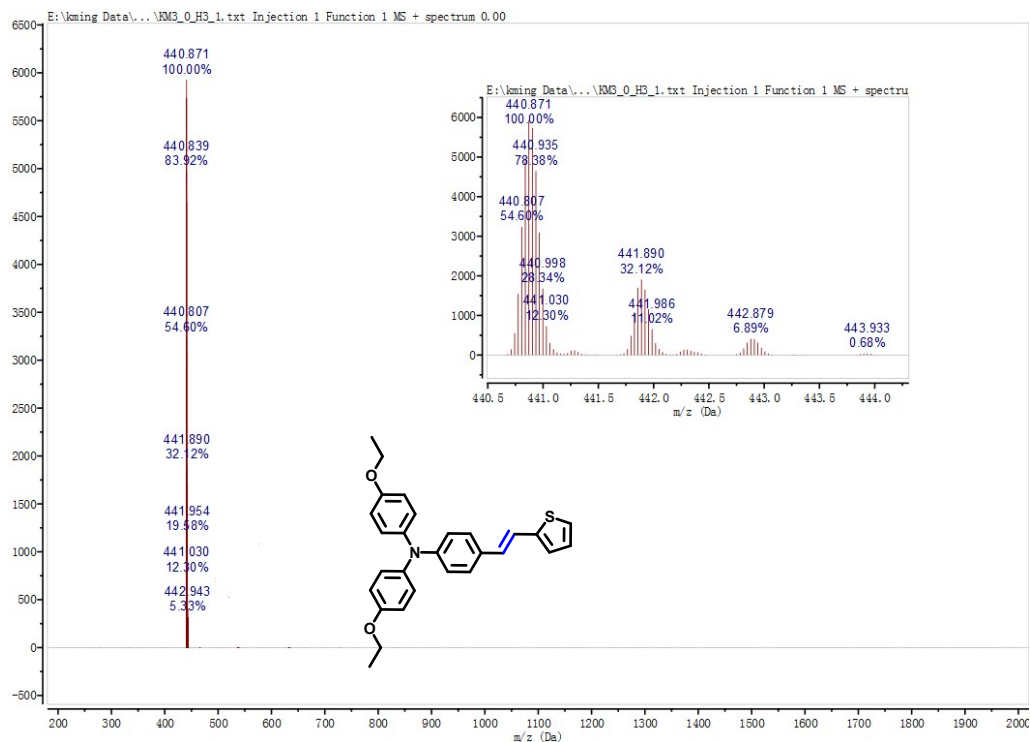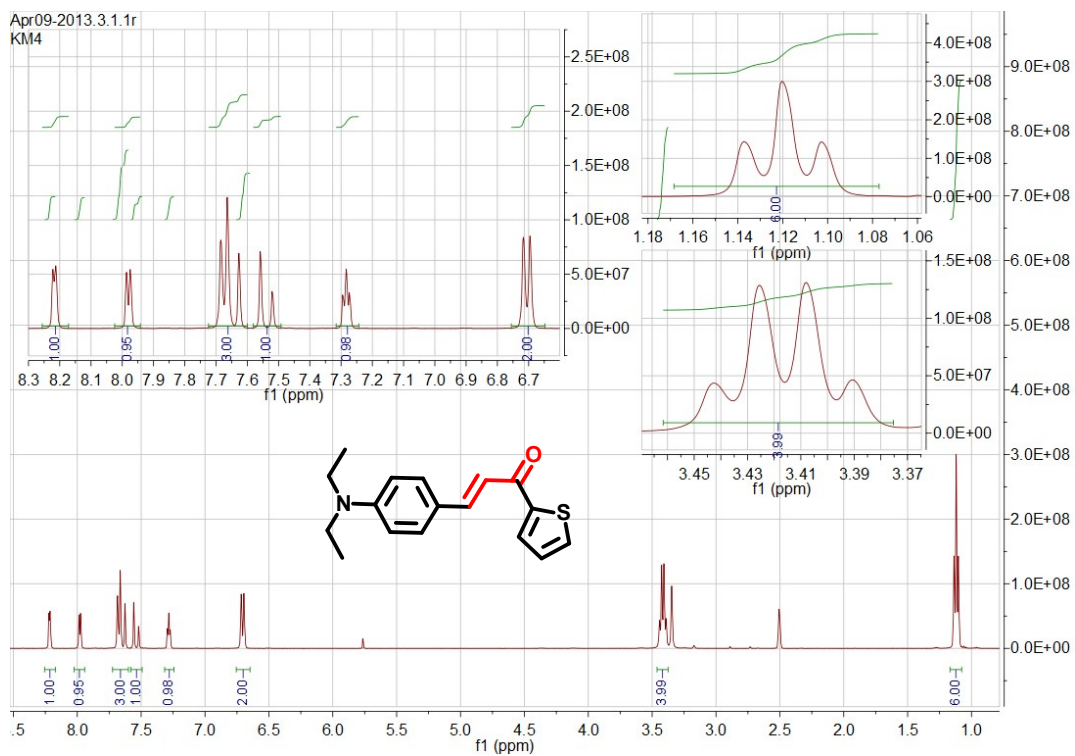



Sep22-2013.20.1.1r  
km4

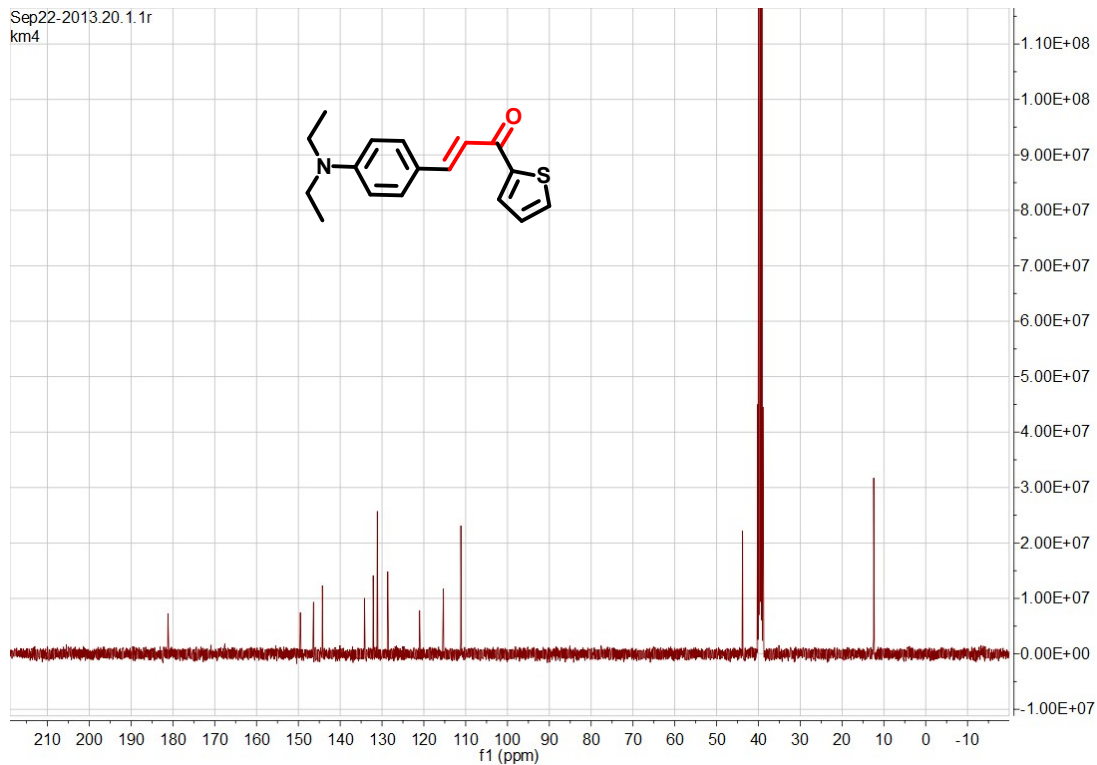

Figure S9.  $^{13}\text{C}$  NMR of XT1

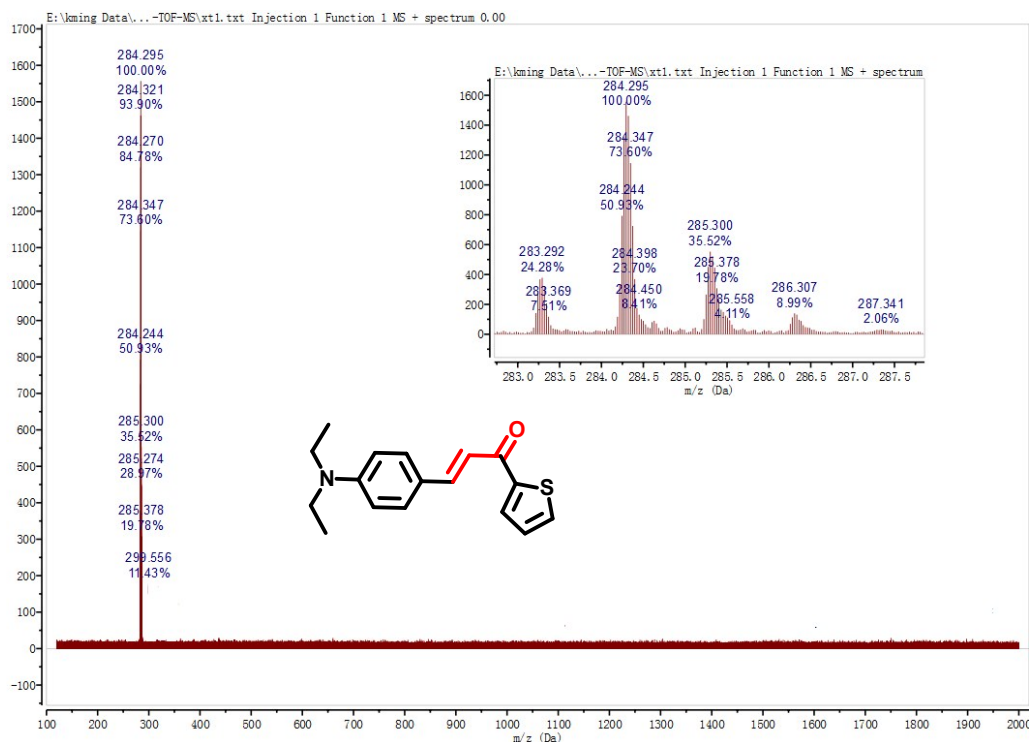

Figure S10. MALDI-TOF-MS of XT1

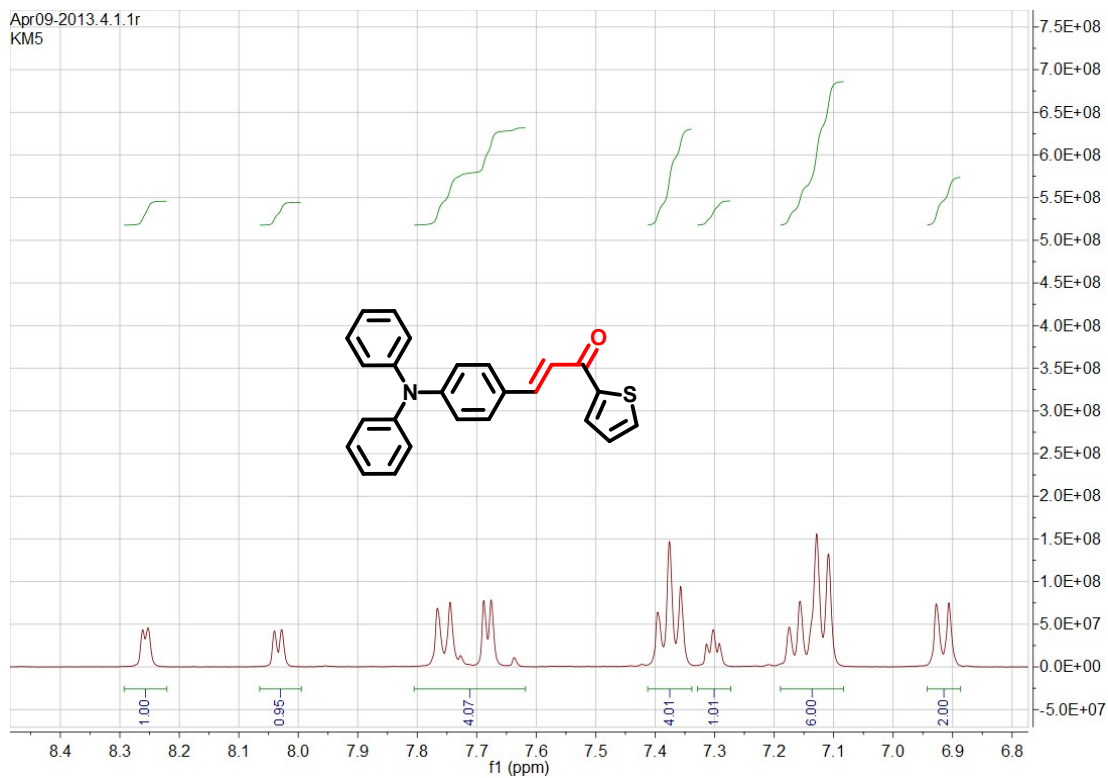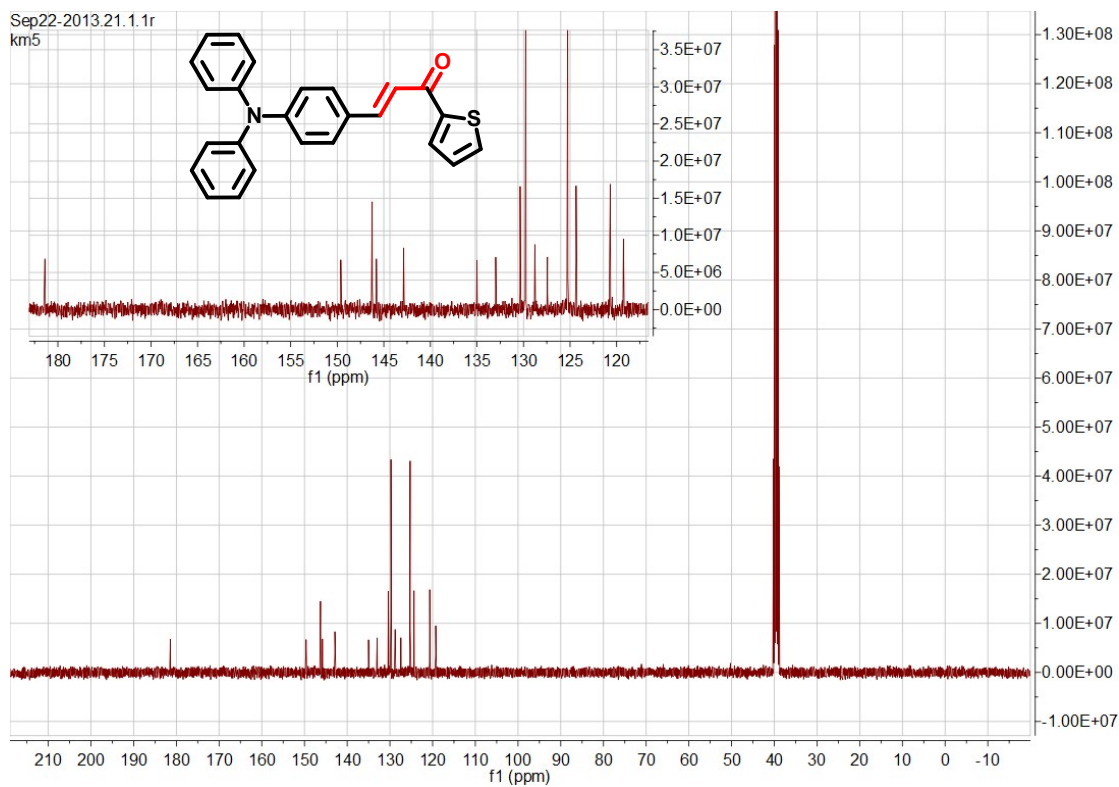

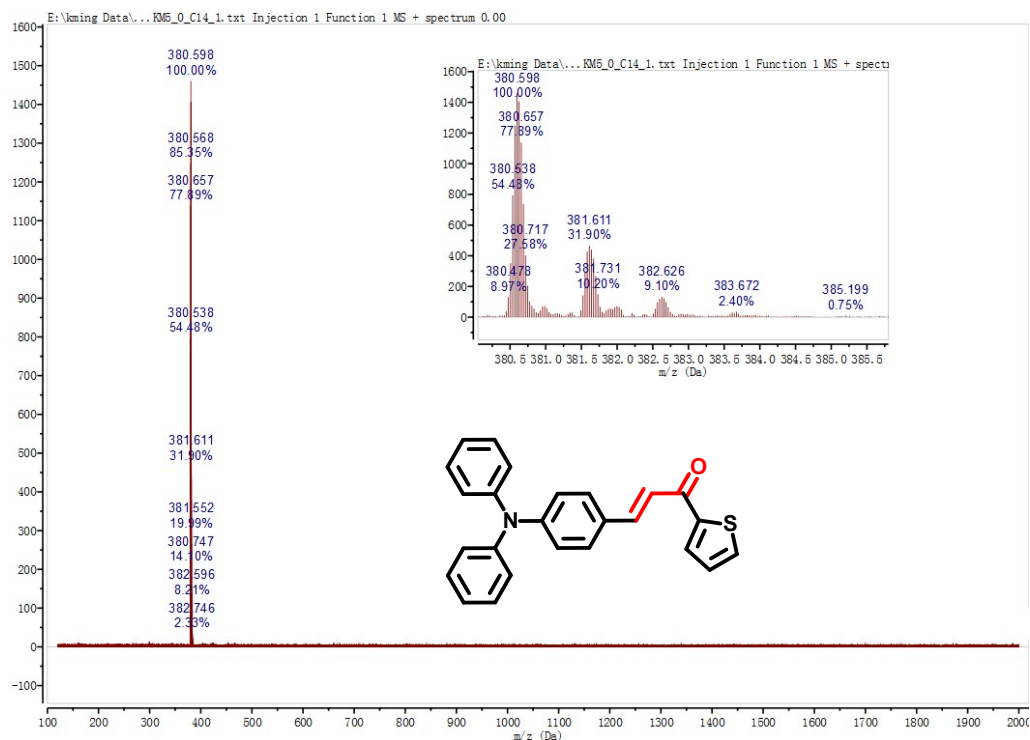

Figure S13. MALDI-TOF-MS of XT2

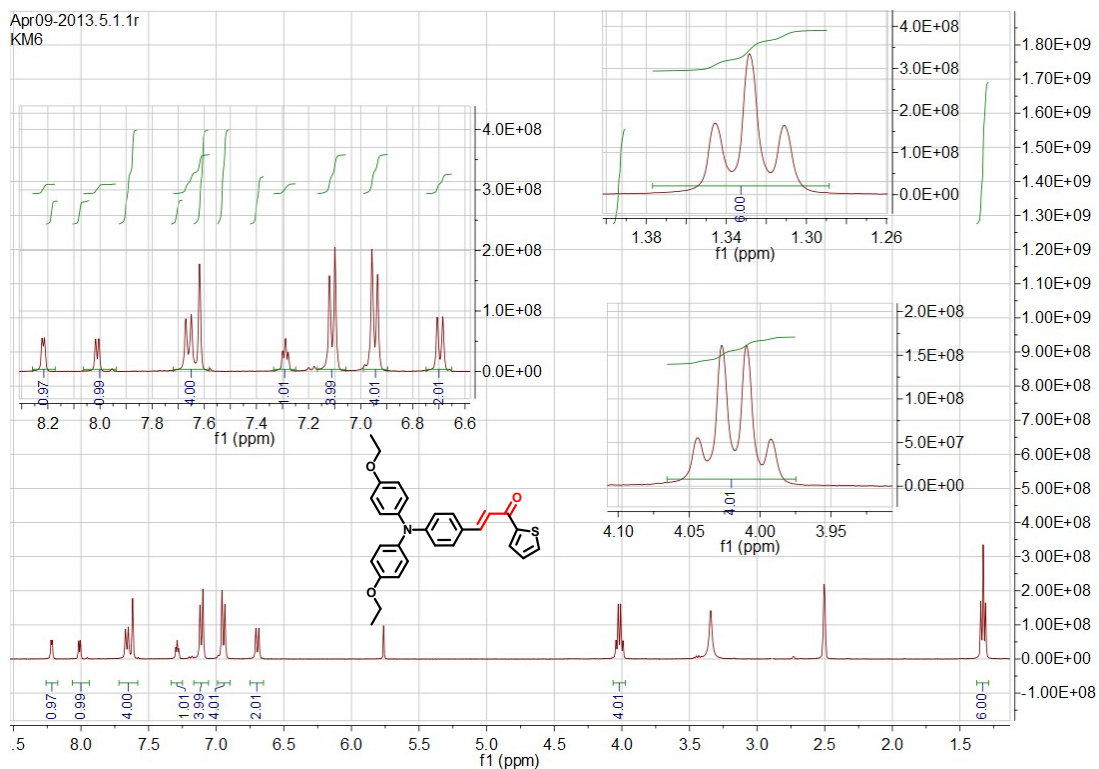

Figure S14. <sup>1</sup>H NMR of XT3

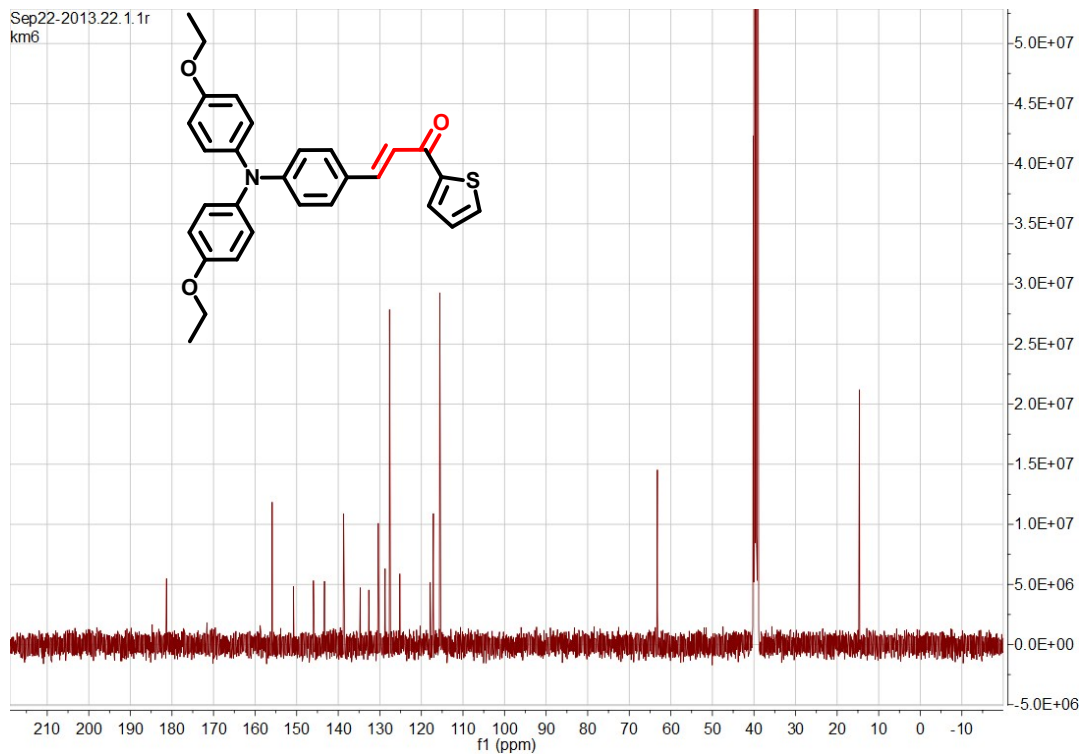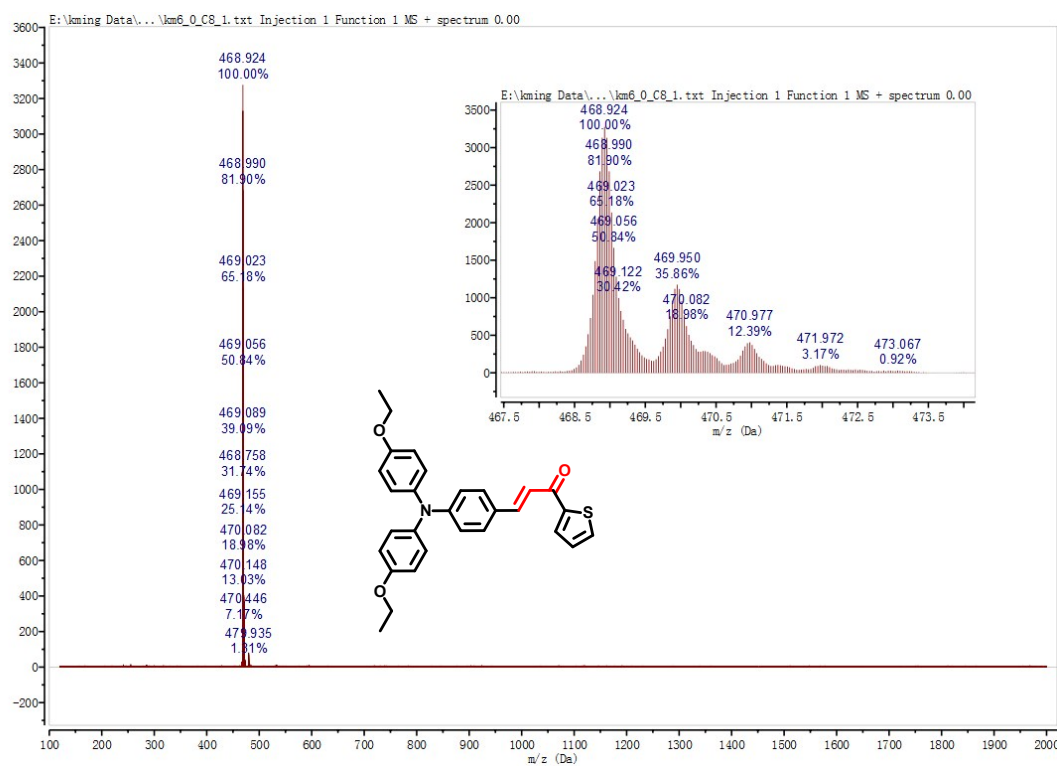

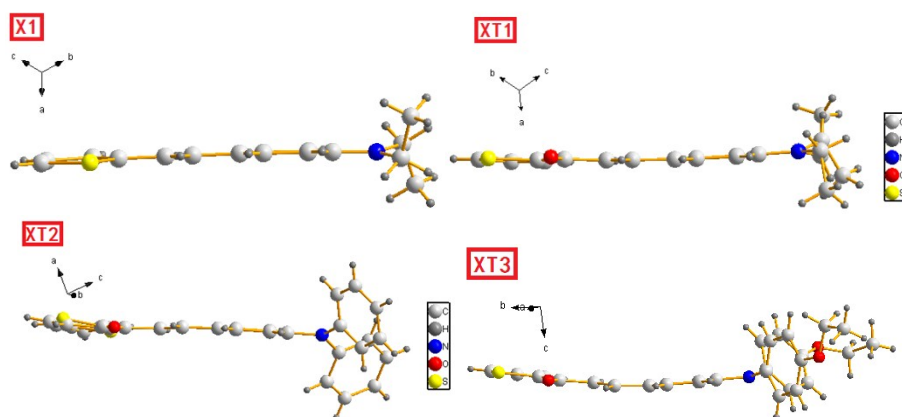

**Figure S17.** Alternative views of **X1**, **XT1**, **XT2** and **XT3** showing the quasi-planarity of terminal moieties.

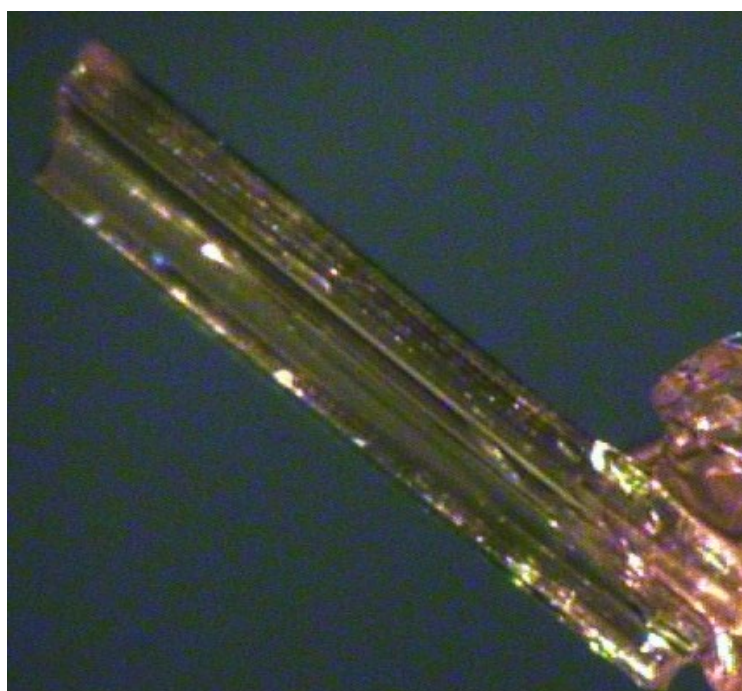

**Figure S18.** The crystal photograph of **XT1**

**Table S1** Selected bond lengths (Å) and angles (°) for **X1**

|             |          |                   |          |
|-------------|----------|-------------------|----------|
| C(1)-H(1A)  | 0.9600   | C(5)-N(1)-C(2)    | 121.6(2) |
| C(2)-H(2A)  | 0.9700   | C(5)-N(1)-C(4)    | 122.6(2) |
| C(2)-C(1)   | 1.511(4) | C(2)-N(1)-C(4)    | 115.8(2) |
| C(4)-C(3)   | 1.513(5) | C(6)-C(7)-C(10)   | 122.9(2) |
| C(4)-H(4A)  | 0.9700   | C(6)-C(7)-H(7)    | 118.6    |
| C(6)-H(6)   | 0.9300   | C(7)-C(10)-C(9)   | 115.9(3) |
| C(10)-C(9)  | 1.398(4) | C(7)-C(10)-C(11)  | 118.8(2) |
| C(10)-C(11) | 1.472(4) | C(9)-C(10)-C(11)  | 125.3(3) |
| C(11)-C(12) | 1.333(4) | C(12)-C(11)-C(10) | 126.6(3) |
| C(12)-C(13) | 1.462(4) | C(12)-C(11)-H(11) | 116.7    |
| C(12)-H(12) | 0.9300   | C(10)-C(11)-H(11) | 116.7    |

|                   |          |                   |          |
|-------------------|----------|-------------------|----------|
| C(11)-H(11)       | 0.9300   | N(1)-C(4)-C(3)    | 113.9(3) |
| C(9)-H(9)         | 0.9300   | N(1)-C(4)-H(4A)   | 108.8    |
| C(8)-H(8)         | 0.9300   | C(11)-C(12)-C(13) | 126.0(3) |
| C(12)-C(13)-S(1)  | 124.7(2) | C(11)-C(12)-H(12) | 117.0    |
| C(14)-C(13)-C(12) | 123.9(3) | C(13)-C(12)-H(12) | 117.0    |

**Table S2** Selected  $\pi\cdots\pi$ , C-H $\cdots\pi$  Interactions and potential hydrogen bonds in **X1**

| <b><math>\pi\cdots\pi</math> interactions</b>                                                                                                                                                   |                                   |                                                       |                                 |
|-------------------------------------------------------------------------------------------------------------------------------------------------------------------------------------------------|-----------------------------------|-------------------------------------------------------|---------------------------------|
| R(i)-R(j)                                                                                                                                                                                       | Dihedral angle(i,j)( $^{\circ}$ ) | $\perp$ distance between the centroid( $\text{\AA}$ ) |                                 |
| R(1)-R(1) <sup>(I)</sup>                                                                                                                                                                        | 47                                | 5.977                                                 |                                 |
| R(1)-R(2) <sup>(II)</sup>                                                                                                                                                                       | 3.07                              | 5.914                                                 |                                 |
| R(1)-R(2) <sup>(III)</sup>                                                                                                                                                                      | 74.61                             | 5.035                                                 |                                 |
| R(2)-R(1) <sup>(IV)</sup>                                                                                                                                                                       | 3.07                              | 5.913                                                 |                                 |
| R(2)-R(1) <sup>(III)</sup>                                                                                                                                                                      | 74.61                             | 4.718                                                 |                                 |
| R(2)-R(2) <sup>(V)</sup>                                                                                                                                                                        | 72                                | 5.023                                                 |                                 |
| <b>hydrogen bond</b>                                                                                                                                                                            |                                   |                                                       |                                 |
|                                                                                                                                                                                                 | d(H $\cdots$ S)                   | d(C $\cdots$ S)                                       | $\angle$ CHS( $^{\circ}$ )      |
| C(11)-H(11) $\cdots$ S(1)                                                                                                                                                                       | 2.85                              | 3.248                                                 | 107                             |
| <b>C-H<math>\cdots\pi</math> Interactions</b>                                                                                                                                                   |                                   |                                                       |                                 |
|                                                                                                                                                                                                 | H $\cdots$ R(2)( $\text{\AA}$ )   | $\angle$ C-H $\cdots$ R(2)( $^{\circ}$ )              | C $\cdots$ R(2)( $\text{\AA}$ ) |
| C(14)-H(14) $\rightarrow$ R(2)(VI)                                                                                                                                                              | 2.69                              | 153                                                   | 3.563                           |
| Symmetry code:(I)1-X,1/2+Y,5/2-Z;(II)X,-1+Y,Z;(III)1/2+X,-1/2-Y,2-Z;(IV)X,1+Y,Z;(V)1/2+X,1/2-Y,2-Z;(VI):-1/2+X,-1/2-Y,2-Z;R(1):S(1)-C(13)-C(14)-C(15)-C(16);R(2):C(5)-C(6)-C(7)-C(10)-C(9)-C(8) |                                   |                                                       |                                 |

**Table S3** Selected bond lengths ( $\text{\AA}$ ) and angles ( $^{\circ}$ ) for **XT1**

|             |          |                 |          |
|-------------|----------|-----------------|----------|
| C(4)-C(5)   | 1.469(5) | C(5)-C(4)-S(1)  | 118.9(2) |
| C(5)-O(1)   | 1.232(4) | O(1)-C(5)-C(6)  | 122.3(3) |
| C(5)-C(6)   | 1.449(5) | O(1)-C(5)-C(4)  | 119.5(3) |
| C(6)-C(7)   | 1.330(5) | C(6)-C(5)-C(4)  | 118.2(3) |
| C(7)-C(8)   | 1.450(5) | C(7)-C(6)-C(5)  | 121.2(3) |
| C(6)-H(6)   | 0.9300   | C(7)-C(6)-H(6)  | 119.4    |
| C(7)-H(7)   | 0.9300   | C(5)-C(6)-H(6)  | 119.4    |
| C(8)-C(9)   | 1.385(4) | C(6)-C(7)-C(8)  | 129.2(3) |
| C(9)-C(10)  | 1.370(5) | C(6)-C(7)-H(7)  | 115.4    |
| C(9)-H(9)   | 0.9300   | C(8)-C(7)-H(7)  | 115.4    |
| C(10)-C(11) | 1.406(5) | C(9)-C(8)-C(7)  | 124.3(3) |
| C(11)-N(1)  | 1.370(5) | C(13)-C(8)-C(7) | 119.2(3) |
| C(16)-N(1)  | 1.453(4) | C(10)-C(9)-C(8) | 122.2(3) |
| C(16)-C(17) | 1.490(6) | C(8)-C(9)-H(9)  | 118.9    |

**Table S4** Selected  $\pi\cdots\pi$ , C-H $\cdots\pi$  Interactions and potential hydrogen bonds in **XT1**

| <b><math>\pi\cdots\pi</math> interactions</b>    |                        |                                          |                    |
|--------------------------------------------------|------------------------|------------------------------------------|--------------------|
| R(i)-R(j)                                        | Dihedral angle(i,j)(°) | $\perp$ distance between the centroid(Å) |                    |
| R(1)-R(1) <sup>(I)</sup>                         | 67                     | 5.079                                    |                    |
| R(1)-R(2) <sup>(II)</sup>                        | 89.98                  | 5.236                                    |                    |
| R(2)-R(1) <sup>(III)</sup>                       | 58.31                  | 4.782                                    |                    |
| R(2)-R(1) <sup>(IV)</sup>                        | 89.98                  | 5.236                                    |                    |
| <b>hydrogen bonds</b>                            |                        |                                          |                    |
|                                                  | d(H $\cdots$ O)        | d(C $\cdots$ O)                          | $\angle$ CHS(°)    |
| C(7)-H(7) $\cdots$ O(1)                          | 2.45                   | 2.799                                    | 102                |
| C(16)-H(16B) $\cdots$ O(1)                       | 2.55                   | 3.497                                    | 166                |
| <b>C-H<math>\cdots\pi</math> Interactions</b>    |                        |                                          |                    |
|                                                  | H $\cdots$ R(2)(Å)     | $\angle$ C-H $\cdots$ R(2)(°)            | C $\cdots$ R(2)(Å) |
| C(15 <sup>*</sup> )-H(15E) $\rightarrow$ R(2)(V) | 2.89                   | 128                                      | 3.559              |

Symmetry code:(I)-1/2+X,Y,1/2-Z;(II)1/2-X,1/2+Y,Z;(III)1-X,-1/2+Y,1/2-Z;(IV) 1/2-X,-1/2+Y,Z;(V)1/2+X,1/2-Y,1-Z;S(1)-C(1)-C(2)-C(3)-C(4);R(2) :C(8)-C(9)-C(10)-C(11)-C(12)-C(13)

**Table S5** Selected bond lengths (Å) and angles (°) for **XT2**

|                   |            |                   |            |
|-------------------|------------|-------------------|------------|
| C(1)-C(6)         | 1.378(2)   | C(20)-H(20)       | 0.9300     |
| C(1)-C(2)         | 1.381(3)   | C(20)-C(21)       | 1.469(2)   |
| C(1)-N(1)         | 1.423(2)   | C(21)-O(1)        | 1.2273(19) |
| C(7)-N(1)         | 1.429(2)   | C(21)-C(22)       | 1.505(18)  |
| C(2)-C(3)         | 1.384(3)   | C(23)-C(22)-S(1)  | 113.6(13)  |
| C(13)-C(14)       | 1.394(2)   | C(23)-C(22)-C(21) | 121.3(12)  |
| C(14)-C(15)       | 1.376(2)   | C(21)-C(22)-S(1)  | 125.0(10)  |
| C(15)-C(16)       | 1.393(2)   | O(1)-C(21)-C(22)  | 119.2(6)   |
| C(14)-H(14)       | 0.9300     | O(1)-C(21)-C(20)  | 121.87(15) |
| C(15)-H(15)       | 0.9300     | C(21)-C(20)-H(20) | 119.7      |
| C(16)-C(19)       | 1.457(2)   | C(19)-C(20)-C(21) | 120.55(15) |
| C(19)-H(19)       | 0.9300     | C(20)-C(19)-H(19) | 115.3      |
| C(19)-C(20)       | 1.329(2)   | C(20)-C(19)-C(16) | 129.35(15) |
| C(17)-C(16)-C(19) | 123.96(14) | C(15)-C(16)-C(19) | 118.71(14) |
|                   |            | C(16)-C(19)-H(19) | 115.3      |

**Table S6** Selected  $\pi\cdots\pi$ , C-H $\cdots\pi$  Interactions and potential hydrogen bonds in **XT2**

| <b><math>\pi\cdots\pi</math> interactions</b> |                        |                                          |  |
|-----------------------------------------------|------------------------|------------------------------------------|--|
| R(i)-R(j)                                     | Dihedral angle(i,j)(°) | $\perp$ distance between the centroid(Å) |  |
| R(1)-R(1) <sup>(I)</sup>                      | 0                      | 4.976                                    |  |
| R(1)-R(2) <sup>(II)</sup>                     | 5.5                    | 4.874                                    |  |
| R(1)-R(3) <sup>(III)</sup>                    | 63.4                   | 4.973                                    |  |
| R(1)-R(5) <sup>(III)</sup>                    | 5.0                    | 5.451                                    |  |
| R(1)-R(5) <sup>(III)</sup>                    | 5.0                    | 4.851                                    |  |
| R(1)-R(5) <sup>(I)</sup>                      | 5.0                    | 5.492                                    |  |
| R(2)-R(2) <sup>(I)</sup>                      | 0                      | 4.77                                     |  |
| R(2)-R(5) <sup>(III)</sup>                    | 9.4                    | 4.815                                    |  |
| R(4)-R(4) <sup>(IV)</sup>                     | 0                      | 5.333                                    |  |
| R(5)-R(4) <sup>(V)</sup>                      | 61.76                  | 5.134                                    |  |

  

| <b>hydrogen bonds</b>     |                 |                 |                 |
|---------------------------|-----------------|-----------------|-----------------|
| D-H $\cdots$ A            | d(H $\cdots$ A) | d(D $\cdots$ A) | $\angle$ DHA(°) |
| C(12)-H(12) $\cdots$ O(1) | 2.56            | 3.489           | 173             |
| C(19)-H(19) $\cdots$ O(1) | 2.43            | 2.795           | 103             |
| C(20)-H(20) $\cdots$ S(1) | 2.79            | 3.175           | 106             |
| C(25)-H(25) $\cdots$ O(1) | 2.39            | 3.289           | 162             |

  

| <b>C-H<math>\cdots\pi</math> Interactions</b> |                    |                               |                    |
|-----------------------------------------------|--------------------|-------------------------------|--------------------|
|                                               | H $\cdots$ R(4)(Å) | $\angle$ C-H $\cdots$ R(4)(°) | C $\cdots$ R(2)(Å) |
| C(5)-H(5) $\rightarrow$ R(4)(VI)              | 2.79               | 149                           | 3.613              |

Symmetry code:(I)2-X,-1-Y,1-Z;(II)1-X,-Y,1-Z;(III)1-X,-1-Y,1-Z;(IV)-X,-Y,2-Z;(V)1+X,Y,Z;(VI) X,1+Y,Z;R(1) S(1)-C(22)-C(23)-C(24)-C(25);R(2) : S(1') C(22') C(23') C(24') C(25');R(3): C(1)-C(2)-C(3)-C(4)-C(5)-C(6);R(4):C(7)-C(8)-C(9)-C(10)-C(11)-C(12);R(5):C(13)-C(14)-C(15)-C(16)-C(17)-C(18);

**Table S7** Selected bond lengths (Å) and angles (°) for **XT3**

|                   |          |                   |          |
|-------------------|----------|-------------------|----------|
| S(1)-C(26)        | 1.707(4) | C(27)-C(26)-S(1)  | 110.1(3) |
| C(26)-C(27)       | 1.358(5) | C(25)-C(26)-S(1)  | 118.9(3) |
| C(26)-C(25)       | 1.454(5) | C(27)-C(26)-C(25) | 131.0(4) |
| C(25)-O(3)        | 1.230(4) | O(3)-C(25)-C(26)  | 120.5(4) |
| C(25)-C(24)       | 1.474(5) | C(26)-C(25)-C(24) | 117.4(4) |
| C(23)-C(24)       | 1.323(5) | O(3)-C(25)-C(24)  | 122.1(4) |
| C(23)-C(22)       | 1.448(5) | C(25)-C(24)-H(24) | 118.9    |
| C(24)-H(24)       | 0.9300   | C(23)-C(24)-H(24) | 118.9    |
| C(23)-H(23)       | 0.9300   | C(24)-C(23)-H(23) | 115.9    |
| N(1)-C(17)        | 1.382(5) | C(22)-C(23)-H(23) | 115.9    |
| N(1)-C(16)        | 1.440(5) | C(21)-C(22)-C(23) | 122.1(4) |
| N(1)-C(8)         | 1.433(5) | C(19)-C(22)-C(23) | 121.5(4) |
| C(24)-C(23)-C(22) | 128.2(4) | C(23)-C(24)-C(25) | 122.2(4) |



**Table S8** Selected  $\pi\cdots\pi$ , C-H $\cdots\pi$  Interactions and potential hydrogen bonds in **XT3**

| <b><math>\pi\cdots\pi</math> interactions</b> |                        |                                          |  |
|-----------------------------------------------|------------------------|------------------------------------------|--|
| R(i)-R(j)                                     | Dihedral angle(i,j)(°) | $\perp$ distance between the centroid(Å) |  |
| R(1)-R(2) <sup>(I)</sup>                      | 57.4                   | 5.358                                    |  |
| R(1)-R(4) <sup>(II)</sup>                     | 14.1                   | 4.208                                    |  |
| R(1)-R(5) <sup>(III)</sup>                    | 15.7                   | 5.656                                    |  |
| R(5)-R(5) <sup>(IV)</sup>                     | 0                      | 5.273                                    |  |
| R(6)-R(6) <sup>(V)</sup>                      | 0                      | 5.424                                    |  |

  

| <b>hydrogen bonds</b>     |                 |                 |                 |
|---------------------------|-----------------|-----------------|-----------------|
| D-H $\cdots$ A            | d(H $\cdots$ A) | d(D $\cdots$ A) | $\angle$ DHA(°) |
| C(23)-H(23) $\cdots$ O(3) | 2.50            | 2.835           | 101             |
| C(43)-H(43) $\cdots$ O(1) | 2.58            | 3.410           | 149             |
| C(52)-H(52) $\cdots$ O(6) | 2.48            | 2.821           | 102             |

  

| <b>C-H<math>\cdots\pi</math> Interactions</b> |                 |                            |                 |
|-----------------------------------------------|-----------------|----------------------------|-----------------|
|                                               | H $\cdots$ R(Å) | $\angle$ C-H $\cdots$ R(°) | C $\cdots$ R(Å) |
| C(1)-H(1C) $\rightarrow$ R(1)                 | 2.90            | 163                        | 3.828           |
| C(15)-H(15) $\rightarrow$ R(8)                | 2.97            | 157                        | 3.848           |
| C(36)-H(36) $\rightarrow$ R(4)                | 2.95            | 151                        | 3.791           |

Symmetry code:(I)3/2-X,-1/2+Y,3/2-Z;(II)1-X,-Y,1-Z;(III)-1/2+X,1/2-Y,1/2+Z;(IV) 1-X,1-Y,2-Z;(V)1-X,-Y,2-Z;R(1):S(1)-C(26)-C(27)-C(28)-C(29);R(2):C(3)-C(4)-C(5)-C(8)-C(7)-C(6);R(3):C(11)-C(12)-C(13)-C(16)-C(15)-C(14);R(4):C(17)-C(18)-C(19)-C(22)-C(21)-C(20);R(5): S(2)-C(55)-C(56)-C(57)-C(58);R(6) C(32)-C(33)-C(34)-C(37)-C(36)-C(35);R(8) C(46)-C(47)-C(48)-C(51)-C(50)-C(49).

**Table S9** Single-photon-related photophysical properties of six dyes in different solvents.

| Compounds | Solvents        | $\lambda_{\max}^a$ ( $\epsilon_{\max}^b$ ) | $\lambda_{\max}^c$ | $\Delta\nu^d$ | $\Phi^e$ | $\tau/\text{ns}$ |
|-----------|-----------------|--------------------------------------------|--------------------|---------------|----------|------------------|
| <b>X1</b> | Benzene         | 360(1.84)                                  | 419                | 59            | 0.023    | 0.59             |
|           | Dichloromethane | 361(1.74)                                  | 443                | 82            | 0.017    | 0.37             |
|           | Tetrahydrofuran | 362(1.77)                                  | 433                | 71            | 0.030    | ~                |
|           | Ethyl acetate   | 357(1.72)                                  | 432                | 75            | 0.023    | 0.42             |
|           | Ethanol         | 353(1.61)                                  | 442                | 89            | 0.040    | 0.37             |
|           | Acetonitrile    | 357(1.67)                                  | 451                | 94            | 0.017    | 0.38             |
|           | DMF             | 363(1.09)                                  | 453                | 90            | 0.029    | ~                |
| <b>X2</b> | Benzene         | 302(2.43) 373(2.25)                        | 425                | 52            | 0.240    | 1.42             |
|           | Dichloromethane | 303(2.26) 374(2.82)                        | 453                | 79            | 0.265    | 2.33             |
|           | Tetrahydrofuran | 302(2.40) 372(2.78)                        | 440                | 68            | 0.260    | ~                |
|           | Ethyl acetate   | 301(1.94) 368(2.05)                        | 438                | 70            | 0.225    | 1.78             |
|           | Ethanol         | 301(1.79) 368(1.97)                        | 445                | 77            | 0.326    | 2.12             |
|           | Acetonitrile    | 301(2.17) 369(2.88)                        | 462                | 93            | 0.218    | 2.80             |
|           | DMF             | 303(1.68) 373(2.57)                        | 461                | 88            | 0.263    | ~                |
|           | Benzene         | 303(1.70) 388(2.59)                        | 463                | 75            | 0.147    | 2.89             |
|           | Dichloromethane | 302(1.81) 387(2.99)                        | 511                | 124           | 0.077    | 4.65             |

|            |                 |           |           |     |     |        |      |
|------------|-----------------|-----------|-----------|-----|-----|--------|------|
| <b>X3</b>  | Tetrahydrofuran | 301(1.71) | 386(2.76) | 491 | 105 | 0.116  | ~    |
|            | Ethyl acetate   | 300(1.95) | 382(3.16) | 490 | 108 | 0.095  | 3.83 |
|            | Ethanol         | 301(1.62) | 382(2.72) | 506 | 124 | 0.039  | 2.75 |
|            | Acetonitrile    | 300(1.69) | 381(3.11) | 521 | 140 | 0.018  | 2.31 |
|            | DMF             | 301(1.57) | 385(3.10) | 520 | 135 | 0.034  | ~    |
| <b>XT1</b> | Benzene         | 282(2.22) | 428(3.20) | 480 | 52  | 0.016  | 0.65 |
|            | Dichloromethane | 287(1.76) | 435(3.75) | 525 | 90  | 0.055  | 2.62 |
|            | Tetrahydrofuran | 285(1.17) | 425(2.57) | 508 | 83  | 0.069  | ~    |
|            | Ethyl acetate   | 283(1.66) | 421(3.79) | 518 | 97  | 0.036  | 1.96 |
|            | Ethanol         | 280(1.59) | 437(4.06) | 550 | 113 | 0.002  | 0.15 |
|            | Acetonitrile    | 280(1.24) | 429(3.46) | 539 | 110 | 0.018  | 0.74 |
|            | DMF             | 286(1.26) | 433(3.92) | 534 | 101 | 0.038  | ~    |
| <b>XT2</b> | Benzene         | 300(2.95) | 422(2.95) | 497 | 75  | 0.091  | 2.62 |
|            | Dichloromethane | 300(3.74) | 426(4.53) | 557 | 131 | 0.022  | 3.74 |
|            | Tetrahydrofuran | 299(2.76) | 416(3.21) | 523 | 107 | 0.073  | ~    |
|            | Ethyl acetate   | 298(2.70) | 413(3.36) | 530 | 117 | 0.027  | 3.02 |
|            | Ethanol         | 298(2.59) | 425(3.23) | 533 | 108 | 0.0006 | 0.14 |
|            | Acetonitrile    | 297(2.73) | 417(3.53) | 575 | 158 | 0.002  | 0.62 |
|            | DMF             | 300(2.45) | 421(3.28) | 564 | 143 | 0.006  | ~    |
| <b>XT3</b> | Benzene         | 299(2.97) | 435(3.21) | 546 | 111 | 0.020  | 2.27 |
|            | Dichloromethane | 299(2.98) | 439(3.64) | —   | —   | —      | ~    |
|            | Tetrahydrofuran | 295(2.85) | 426(3.38) | 574 | 148 | 0.003  | ~    |
|            | Ethyl acetate   | 295(2.58) | 426(3.19) | 576 | 150 | 0.0003 | 0.51 |
|            | Ethanol         | 296(2.41) | 441(3.08) | —   | —   | —      | ~    |
|            | Acetonitrile    | 295(2.81) | 428(3.85) | —   | —   | —      | ~    |
|            | DMF             | 299(2.01) | 433(2.97) | —   | —   | —      | ~    |

<sup>a</sup> Absorption peak position in nm. <sup>b</sup> Maximum molar extinction coefficient in  $10^4 \text{ mol}^{-1} \text{ L cm}^{-1}$ . <sup>c</sup> Peak position of SPEF, excited at the maximum wavelength of absorption. <sup>d</sup> Stokes shift in nm. <sup>e</sup> Quantum yields determined by using quinine sulfate as standard.

—Fluorescence quenching.

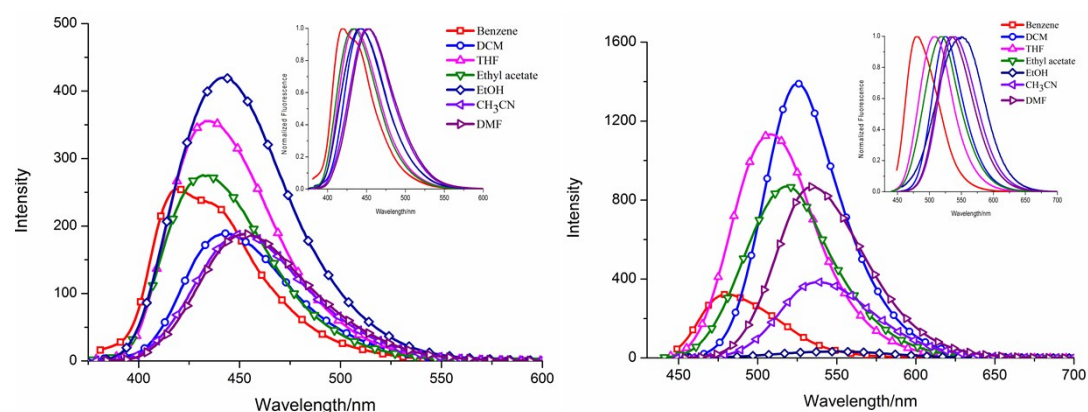

**Figure S19.** Fluorescence spectra of dyes **X1**(left) and **XT1**(right) in different solvents of different polarities with a concentration of  $1.0 \times 10^{-5} \text{ mol/L}$ .

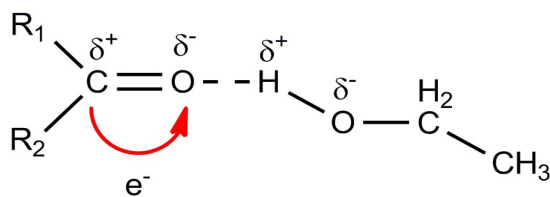

**Figure S20.** The formation process of hydrogen bond.

**Table S10** Selected experimental and calculated optical data for the dyes

| Compd.     | OI <sup>[a]</sup> | $\Delta E(\text{eV})$ <sup>[b]</sup> | Cal. $\lambda_{\text{max}}$<br>(nm) <sup>[c]</sup> | Obs. $\lambda_{\text{max}}$<br>(nm) <sup>[d]</sup> | f <sup>[e]</sup> | Character                                   |
|------------|-------------------|--------------------------------------|----------------------------------------------------|----------------------------------------------------|------------------|---------------------------------------------|
| <b>X1</b>  | HOMO→LUMO         | 3.4008                               | 365                                                | 353                                                | 1.0508           | ICT/ $\pi \rightarrow \pi^*$                |
| <b>X2</b>  | HOMO→LUMO+2       | 4.0663                               | 305                                                | 301                                                | 0.1533           | $\pi \rightarrow \pi^*$                     |
|            | HOMO→LUMO         | 3.2578                               | 381                                                | 368                                                | 1.1358           | ICT/ $\pi \rightarrow \pi^*$                |
| <b>X3</b>  | HOMO→LUMO+3       | 4.2192                               | 294                                                | 301                                                | 0.0988           | $\pi \rightarrow \pi^*$                     |
|            | HOMO→LUMO         | 3.3595                               | 369                                                | 382                                                | 1.2417           | ICT/ $\pi \rightarrow \pi^*$                |
| <b>XT1</b> | HOMO→LUMO+1       | 4.4290                               | 280                                                | 280                                                | 0.0644           | $n \rightarrow \pi^*/\pi \rightarrow \pi^*$ |
|            | HOMO→LUMO         | 2.8728                               | 432                                                | 437                                                | 0.8660           | ICT/ $\pi \rightarrow \pi^*$                |
| <b>XT2</b> | HOMO→LUMO+3       | 4.2534                               | 291                                                | 298                                                | 0.1694           | $\pi \rightarrow \pi^*$                     |
|            | HOMO→LUMO         | 2.7400                               | 452                                                | 425                                                | 0.8023           | ICT/ $\pi \rightarrow \pi^*$                |
| <b>XT3</b> | HOMO→LUMO+3       | 4.2671                               | 291                                                | 296                                                | 0.0878           | $\pi \rightarrow \pi^*$                     |
|            | HOMO→LUMO         | 2.7798                               | 446                                                | 441                                                | 0.8393           | ICT/ $\pi \rightarrow \pi^*$                |

[a]Orbitals involved in the excitations, [b]Excitation energies (eV), [c]Calculated peak position

of the longest absorption band in ethanol, [d] Observed peak position of the longest absorption

band in ethanol, [f]Oscillator Strengths

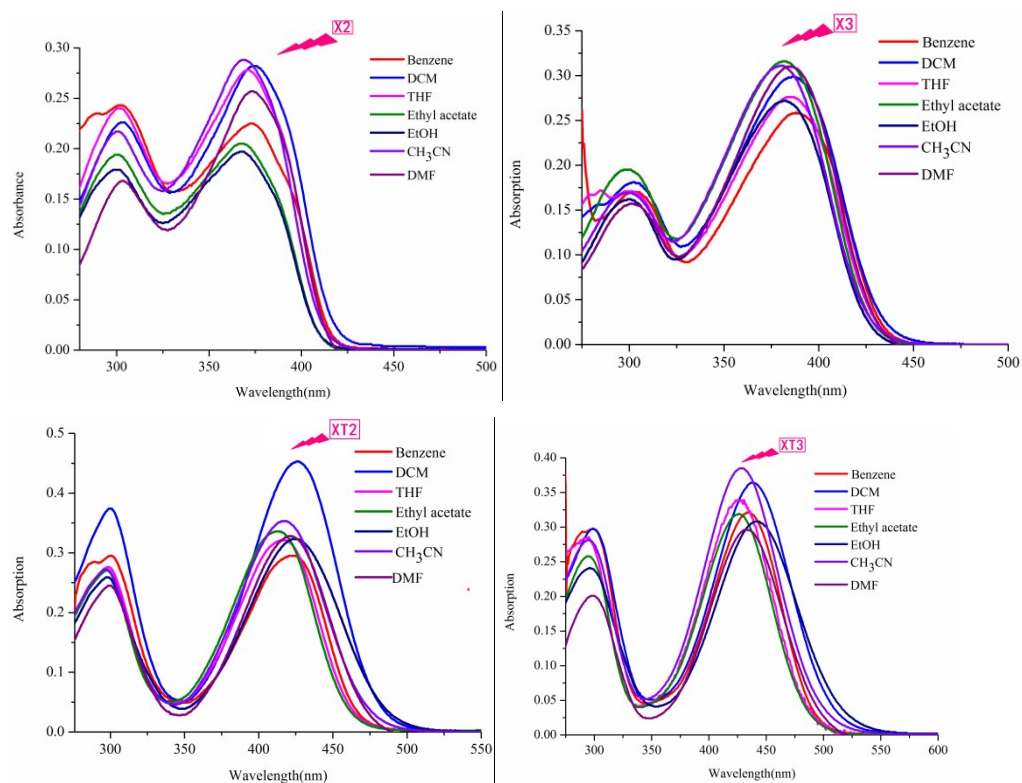

**Figure S21.** Absorption spectra of dyes **X2**, **X3**, **XT2** and **XT3** in different solvents of different polarities with a concentration of  $1.0 \times 10^{-5}$  mol/L.

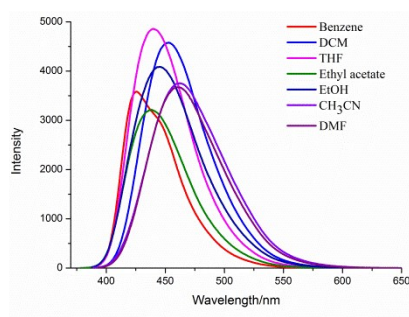

**Figure S22.** Fluorescence spectra of dye **X2** in different solvents of different polarities with a concentration of  $1.0 \times 10^{-5}$  mol/L.

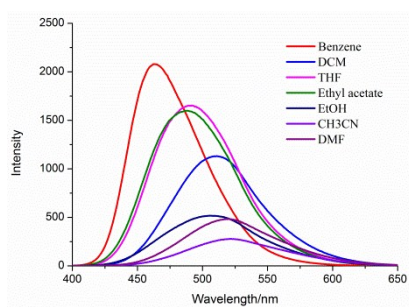

**Figure S23.** Fluorescence spectra of dye **X3** in different solvents of different polarities with a concentration of  $1.0 \times 10^{-5}$  mol/L

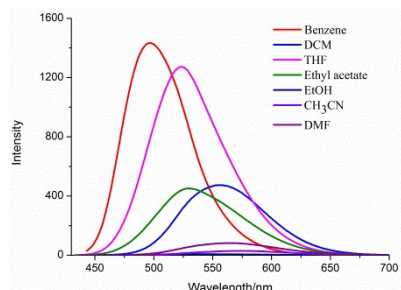

**Figure S24.** Fluorescence spectra of dye **XT2** in different solvents of different polarities with a concentration of  $1.0 \times 10^{-5}$  mol/L

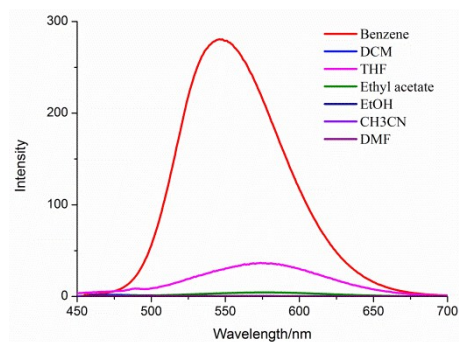

**Figure S25.** Fluorescence spectra of dye **XT3** in different solvents of different polarities with a concentration of  $1.0 \times 10^{-5}$  mol/L

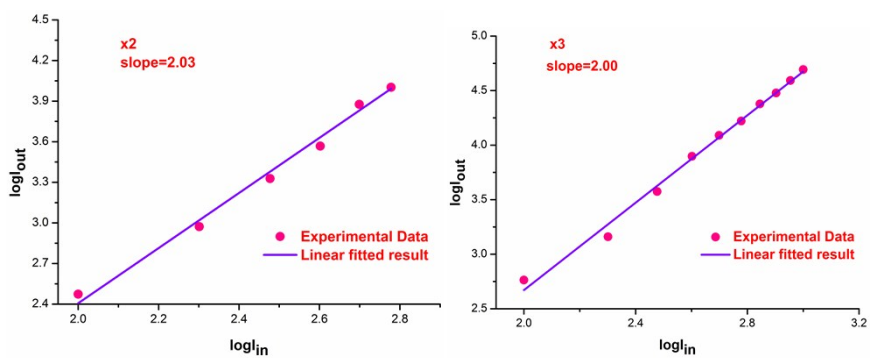

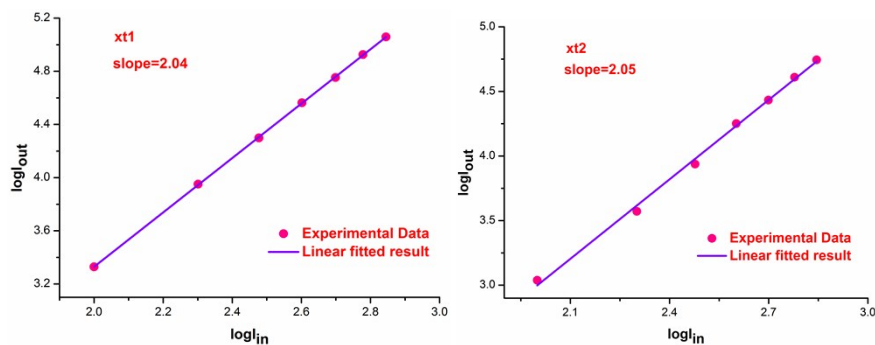

**Figure S26.** Two-photon absorption verification of X2, X3, XT1 and XT2 which  $I_{in}$  and  $I_{out}$  represent the input laser power and output fluorescence, respectively.

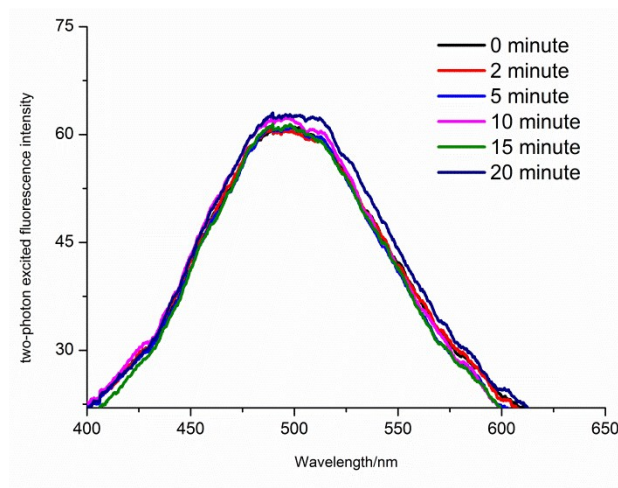

**Figure S27.** Time-dependent two-photon excited fluorescence of X2 excited at 790 nm in DMF.

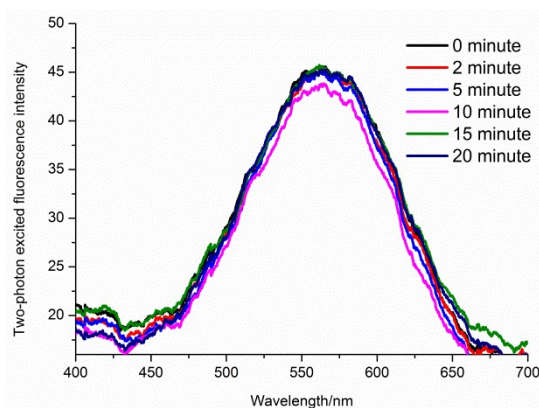

**Figure S28.** Time-dependent two-photon excited fluorescence of X3 excited at 790 nm in DMF.

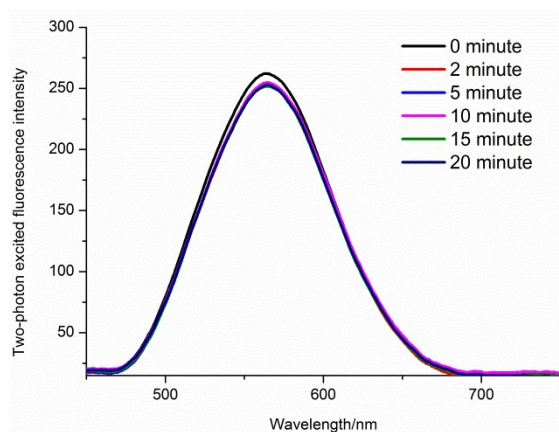

**Figure S29.** Time-dependent two-photon excited fluorescence of **XT1** excited at 830 nm in DMF.

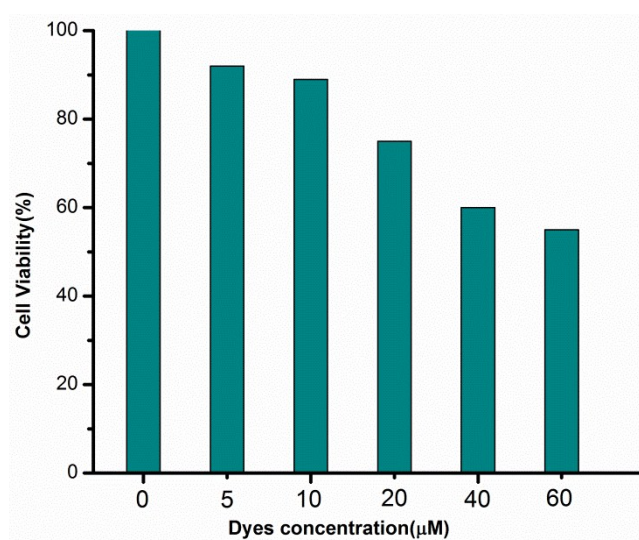

**Figure S30.** MTT assay of HepG2 cells incubate with dyes **X2** at different concentrations for 24h.

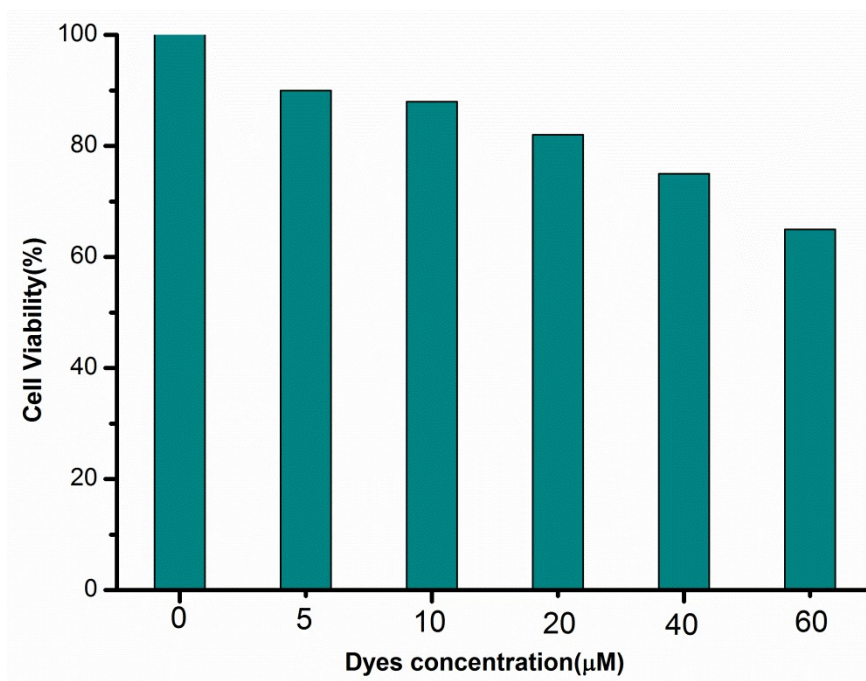

**Figure S31.** MTT assay of HepG2 cells incubate with dyes **XT1** at different concentrations for 24h.
